# Supplementary material
Source: HighWire-hosted journal article supplement (https://heartasia.bmj.com/content/11/1/e011114)
Supplement: inline-supplementary-material-1 [file inline-supplementary-material-1.docx]

Supplement Table 1. Clinical characteristics based on medical therapy at 12 months

DAPT: dual antiplatelet therapy
